# Supplementary material
Source: PubMed Central journal article supplement (PMC1913722)
Supplement: plntcell_tpc.107.051920_1.pdf [file plntcell_tpc.107.051920_1.pdf]

|          |     |                                                                  |
|----------|-----|------------------------------------------------------------------|
| At_FT    | 1   | MSINIRDPLIVSRVVGDVLDPFNRSTLKVTYGQREVTNGLDLRPSQVQNKPRVEIGGED      |
| Cm_FTL1  | 1   | MPRN-RDPLVVGRVIGDVVDSFSSRSISIRVVYDSREVNNGCELKPSQAVNKPRVEIGGTD    |
| Cm_FTL2  | 1   | MPRD-RDPLVVGRVIGDVVDSFTKSISIRATYNNREISNGCELKPSQVVNQPRVEIGGTD     |
| Cmo_FTL1 | 1   | MPRD-RDPLVVGRVIGDVVDSFSSRSISIRVAYNSRKVKNGCELKPCQVINKPRVEIGGTD    |
| Cmo_FTL2 | 1   | MPRD-RDPLVIGRVIGDVVDSFTRSSISIRATYNNREISNGCELKPSQVVNQPRVEIGGTD    |
|          |     |                                                                  |
| At_FT    | 61  | LRFNYTLVMVDPDVPSPSNPHLREYLHVLVTDIPATTGTFGNEIVCYENPSPTAGIHRV      |
| Cm_FTL1  | 60  | LRTFFTLVMVDPDAPSPSDPNLREYLHVLVTDIPATTEATFGQEIVCYENPRPTVGIHRF     |
| Cm_FTL2  | 60  | LRTFFTLVMVDPDAPSPSDPNLREYLHVLVTDIPATTGANFGQEIVCYESPRPTVGIHRL     |
| Cmo_FTL1 | 60  | LRTFFTLVMVDPDAPSPSDPNLREYLHVLVTDIPATTEATFGQEIVCYENPRPTAGIHRF     |
| Cmo_FTL2 | 60  | LRTFFTLVMVDPDAPSPSDPNLREYLHVLVTDIPATTGATFGQEIVCYESPRPTVGIHRL     |
|          |     |                                                                  |
| At_FT    | 121 | VFILFRQLGRQTVYAPGWRQNFNTREFAEIYNLGLPVAAVFYNCQRESGCGGRRL----- 175 |
| Cm_FTL1  | 120 | VLVLFRLGRQTVYAPGWRQNFNTRHFAELYNLGSPVAAVFYNCQRENGSGGRRRAGDECS 180 |
| Cm_FTL2  | 120 | VLVLFRLGRQTVYAPGWRQNFNTRDFAELYNLGSPVAAVFYNCQRENGSGGRRRTQDDF- 179 |
| Cmo_FTL1 | 120 | VLVLFRLGRQTVYAPGWRQNFNTRHFAELYNLGSPVAAVFYNCQRENGSGGRRRAGDECS 180 |
| Cmo_FTL2 | 120 | VLVLFRLGRQTVYAPGWRQNFNTRDFAELYNLGSPVAAVFYNCQRENGSGGRRRSQDDF- 179 |

**Supplemental Figure 1:** Comparison of *Arabidopsis* FT, Cm\_FTL1, Cm\_FTL2, Cmo\_FTL1 and Cmo\_FTL2 conceptual amino acid sequences. Cm\_FTL1 (GenBank accession number DQ865290), Cm\_FTL2 (GenBank accession number DQ865291), Cmo\_FTL1 (GenBank accession number EF462211) and Cmo\_FTL2 (GenBank accession number EF462212) encode proteins of 20.3, 20.2, 20.3 and 20.2 kDa, respectively. Yellow boxes indicate identity.
