# Supplementary material
Source: PubMed Central journal article supplement (PMC1913722)
Supplement: plntcell_tpc.107.051920_4.pdf [file plntcell_tpc.107.051920_4.pdf]

```

                *           20           *           40           *           60
Os_MFT1      : GATCCGCTGGTGGTGGGACGGGTGATCGGGGAGGTTGGTGGATTGTTCCGTTCCATCCATCTCCATGA : 67
Os_MFT2      : GACCCGCTGGTGGTGGGGAGGGTGTATCGGCGACGTTGGTGGACCTGTTCCGTGCCGACGACGGCCATGT : 67
AT_MFT       : GATCCTTTGGTGGTGGGAAGAGTGTATCGGAGATGTGTGGACATGTTCCATCCCAACCGCCAATATGT : 67
PT_MFT       : GATCCTCTTGTGCTTGGTCTGTATTGGTGTATGTTGGTTGATATGTTTGTCCCTGCTGTAAAAATGT : 67
Os_FT-L8     : ---AGCCTGGTGGTGGGGCGGGTGTATCGGCGACGTTGGTGGACCTGTTCTCGCCGGAGGTGACGCTCC : 64
AT_BFT       : GAGCCACTAACTACTGGGAAGAGTGTATAGGAGATGTACTCGAAATGTTTAAATCCAAGTGTGACAATGA : 67
PT_BFT       : GAACCACTGACTCTCGGGAGAGTGTGGGAGATGTTGGTGGATATATTCACCTCTAGTGTGAGAATGA : 67
NT_CET1      : GAACCACTTGTGCTTGCACAGTGTATAGGAGAAAGTAGTAGACAGTTCACACCAAGTGTGAAACTGA : 67
Bn_TFL1-1    : GAGCCATTAATACTGGGAAGAGTGGTCCGAGATGTTCTTGTATAATTCACCTCCAACAATTAATAATGA : 67
AT_TFL1      : GAGCCATTGATAAATGGGGAGAGTGGTAGGAGATGTTCTTGTATTTCACCTCCAACAACCTAAGATGA : 67
Os_FDR2/RC   : GAGCCTCTTGTGCTTAGGGCCGCTGATTGGGGAGGTTCTTGTATACCTTTAACCATGCAATGAAGATGA : 67
Os_FDR1      : GAGCCTCTTGTGCTTGGGCGGGTGTATCGGAGAGTATTGATTCATTCACCCATGTACGAAGATGA : 67
Os_RCN3      : GAGCCTCTCATGCTGGGAAGAGTGTATCGGCGAGGTTGCTGGACAACCTCACACCCACGGTGAAGATGA : 67
Os_RCN2      : GAGCCTCTCGTCTCGGGAGAGTGTATCGGAGAGGTCATCGACAACCTCACACCCACGGTGAAGATGA : 67
Am_CEN       : GACCGCTAGTGTATAGGGAGAGTATCGGAGACGTTGTTGATCATTTACCTCAACTGTTAAAAATGT : 67
Le_SP        : GAACCCCTTGTGATTGGTAGACTGATTGGTGAAGTTGTTGATTATTCCTGTCCAAGTGTAAAGATGT : 67
NT_CET2      : GATCCCTTGTGATTGGTAGACTGATTGGGGAGTGTGTTGATTATTCACCTCAAGTGTAAAGATGT : 67
NT_CET4      : GATCCCTTGTGATTGGTAGACTGATTAGGGAGGTTGTTGATTATTCACCTCAAGTGTAAAGATGT : 67
AT_ATC       : GACCCGCTTATGCTTGGGAGAGTGTATCGGAGACGTTGTGGACAATTGTTTGCAGGCAGTGAAAATGA : 67
PT_CEN1      : GATCCTCTTGTGGTGGGAGAGTGTATGGAGATGTAATTGATTATTCACCTCAAAATGTGAAAATGA : 67
PT_CEN2      : GAGCCTCTTGTGGTGGGAGAGTGTATGGAGATGTAATTGATTATTCACCTCAAAATGTGAAAATGA : 67
Os_FT-L9     : GAGCCCTTGGTGGTGGGCTCATCTCATACATGACGTTGTAGATCCATTTAGACCAACTATGCCCTTA : 67
Os_FT-L7     : GACCCGCTGGTGGTGGGGAGCATCGTCCGCGACGTTGGTGGACCACTTCGGGCGCTCGGCGCTGCTGA : 67
Os_FT/FT-L   : GACCCATTGGTCTCGGTCATCTCGTCCGCGATATCGTGGACCCGTTCCGTACCACCGCTTCGCTTA : 67
Os_FT-L6     : GACCCACTTGTGCTAGGACATGTTGTTGGGGATATCTTAGACCCAATTCACAAAATCAGCATCACTCA : 67
AT_TSF       : GATCCTCTTGTGGTGGGAGAGTGTGTTGGAGATGTTCTTGGATCCCTTCACGAGGTGGTCTCTCTTA : 67
AT_FT        : GACCCCTCTTACTAAGCAGAGTGTGGGAGACGTTCTTGTATCCGTTAATAGATCAATCACTCTAA : 67
TA_FT        : GACCCGCTGGTGGTGGCAGGTTGTGGGGAGCGTGTGGACCCCTTCGTCCGACCAACCAACCTCA : 67
Md_FT        : GACCCCTTGTGCTTGGACAGTGGTGGTGTATGTTTGTAGACCCCTTCACAAGGTCTGTTTCTCTGA : 67
Le_SP5G      : GATCCTTTAACTAGTTTCTGAGTGTGGAGATGTTGTTGATCCATTCACAAGATGTGTAGACTTTG : 67
Le_SFT/SP3   : GATCCTCTTGTGCTGGTCTGTGGTAGGGGATGTAATTGGACCCCTTCACAAGAAGTATTTGGCTTAA : 67
PT_FT1       : GATCCTCTGAGCGTTGGCCGTGTATAGGGGACGTTGCTGGACCCCTTCACAAAGTCTATCTCCCTCA : 67
PT_FT2       : GAACCTCTTAGTCTGGCCGTGTATAGGGGACGTTGTTGGACCCCTTCACAAGATCTATCTCCCTCA : 67
Cm_FTL1      : GACCCCTCTAGTCTCGGGAGAGTGTATCGGCGACGTTGTCGACTCGTTCTCGAGGTCCATCTCGATTA : 67
Cm_FTL2      : GACCCCTTGGTGGTGGGAGAGTGTATCGGCGACGTTATCGACTCGTTCCAGAAAGTCCATTTCCGATTA : 67
Cmo_FTL1     : GACCCCTAGTCTCGGGAGAGTGTATCGGCGACGTTATCGACTCGTTCTCGAGGTCCATCTCGATTA : 67
Cmo_FTL2     : GACCCCTTGGTGGTGGGAGAGTGTATCGGCGACGTTATCGACTCGTTCCAGAGGTCCATTTCCGATTA : 67
Os_RFT1/FT   : GATCCTCTTGTGGTGGCAGGATGTTGGGTGTATGCTGGATCCATTCGTCCGGATCACTAACCTCA : 67
Os_Hd3A/FT   : GACCCCTCTTGTGGTGGTAGGTTGTGGGTGTATGCTGGACGCGTTCCGTCCGGAGCACCACCTCA : 67
Os_FTL/FT-   : GACCCGCTGGTGGTGGGGAGGTTGGTGGGGAGCGTGGTGGACCCGTTCCGTGAGGAGGTTGGCGTGC : 67
Os_FT-L11    : GACTCATGACAAGGAGCCATAAGTTGGAGATGTTGTTAGACCAATTTTCAAACCTCAGTGCCCTCAA : 67
Os_FT-L10    : GATTTCATGGCTACAGGGCCTGTGATCGGAGATGTTCTGGATCCCTTCATCAGCACCGTTCGATCTCA : 67
ga cc T t t gg g gT T gg GA gT T GA Ttc T

```

```

      *           80           *           100           *           120           *
Os_MFT1 : CCGCCGCCTACGGCGAC---AGGGACATCAGCAACGGCTGCCTCGTCCGGCCATCCGGCCCGACTA : 131
Os_MFT2 : CGGTGCGGTTCCGGACC---AAGGACCTCACCAACGGCTGCAGATCAAGCCGTCGTCGCCGCCGC : 131
AT_MFT : CTGTCTACTTTGGCCCC---AACAACATCACTAACGGCTGCAGATCAAAACCTCCACCAGTCAA : 131
PT_MFT : CTGTTTATTATGGATCA---AAGCATGTTAGCAATGGGTGTGATATTAAGCCCTCTTTGTCCGTGGA : 131
Os_FT-L8 : GGGTGATGTACAACGGC---GTGCGGGTCGTAAACGGCGAGACCTCCGGCCGTCGGCGGTGTCGGC : 128
AT_BFT : GAGTCACTTCAATTCCAACAACATCGTATCCAATGGTCACAGCTCCGGCCCTCTCTTCTCCTCTC : 134
PT_BFT : CTGTACTTATAACTCCAACAACAAGTTGCTAATGGCTATGAATTCATGCCCTCTGTCAATGCTTA : 134
NT_CET1 : ATGTGATATACAACGGGAGCAACAAGTATTTAATGGGCATGAATTCATGCCCTGTGTCAATGCTGC : 134
Bn_TFL1-1 : ACGTGAGTTACAACAAG---AAGCAAGTCTCCAATGGCCATGAGCTTTTCCCTTTAGCTGTCTCCTC : 131
AT_TFL1 : ATGTAGTTATAACAAG---AAGCAAGTCTCCAATGGCCATGAGCTCTTTCTTCTTCTGTTCCTC : 131
Os_FDR2/RC : TAGTGACCTATAACTCCAACAAGCTTGATTTAATGGTCATGAGCTCTACCCATCAGCAGTGTGTGTC : 134
Os_FDR1 : TAGTAACCTACAATTCAAACAAGCTTGTCTTTAATGGCCATGAGTCTACCCATCAGCAGTGTATC : 134
Os_RCN3 : CGGCCACCTACGGCGCCAACAAGCAGGTGTTCAACGGCCACGAGTCTTCCCTCCGCCGTGCGCCG : 134
Os_RCN2 : CGCGACCTACAGCTCCAACAAGCAGGTGTTCAACGGCCACGAGTATTCCCTCCGGCGGTGCTGTC : 134
Am_CEN : CTGTATTTACAACCTCCAACAAGCATGTCTACAATGGCCATGAGCTCTTTCTTCCGCTGTACCTC : 134
Le_SP : CTGTGTTTATAACAACAACAAGCATGTCTATAATGGACATGAATCTTTCTTCTCAGTACTTC : 134
NT_CET2 : CTGTACTTATAACAGCAGCAAGCATGTTTATAATGGGCATGAATCTTTCTTCTCAGTACTTC : 134
NT_CET4 : CTGTACTTATAACAGCAGCAAGCATGTCTATAATGGACATGAATCTTTCTTCTCAGTACTTC : 134
AT_ATC : CGGTGACCTATAATTCTGACAGCAAGTCTACAATGGCCATGAATCTTTCTTCTGTAGTTACATA : 134
PT_CEN1 : CTGTCACTTATAACTCCAACAAGCAGGTTTATAATGGCCATGAGCTTTTCCATCTGTGTCACTCA : 134
PT_CEN2 : CAGTGACTTATCAGTCCAACAAGCAGGTTTTATAATGGCCATGAGTATTCCATCTGCGGTACTCA : 134
Os_FT-L9 : GAATAACATACAACGAT---AGGTTACTTCTGCGAGGTGCTGAGCTGAAACCATCTGCAACTGTGCA : 131
Os_FT-L7 : GGCTGTTCTACAACCAC---CGCGAGATGACGACGGGTGTCGAGCTCAGGCCGTCGCGAGTGC : 131
Os_FT/FT-L : GGCTCTTCTACAACAGC---AAGGAGATGACAATGGGTCTGAGCTCAAGCCATCTCAGGTGTGAA : 131
Os_FT-L6 : AGTTCCTATACAACAAC---AAGGAATTAACAATGGGTCTGAGCTCAAAACCTCAGAGTACAAA : 131
AT_TSF : AGTCACTTATGGCCAT---AAGAGGTTACTAATGGCTTGATCTAAGGCCCTCTCAAGTCTGAA : 131
AT_FT : AGGTACTTATGGCCAA---AAGAGGTTACTAATGGCTTGATCTAAGGCCCTCTCAGGTCAAAA : 131
TA_FT : GGTTGACCTTCGGGAAC---AGGACCGTGTCAACGGCTGCAGCTCAAGCCCTCATGTCGCCCA : 131
Md_FT : GGTTGACCTACGGTACT---AAGGAGGTTAACAATGGTTGTGAGCTCAAAACCTCTGAAGTGTCCA : 131
Le_SP5G : GTGTGGTTTACAACAAT---AGGGTGGTCTATAATGGATGTTCTTGAGGCCCTCACAAGTGTCAA : 131
Le_SFT/SP3 : GACTATATATAGAGAT---AAGAAAGTAAATAATGGATGCGAGCTTAGGCCCTCCAAGTATTAA : 131
PT_FT1 : GGTTCACTTACAGCTCC---AAGAGGTTCAACAATGGTTGCGAGCTCAAGCCCTCTCAGGTG : 131
PT_FT2 : GGTTCAACTACAATTCT---AAGAGGTTAACAATGGTTGTGAGCTCAAAACCTCTCATGTTGTC : 131
Cm_FTL1 : GGTTGTTTTACGACTCG---AAGGAAAGTTAACAATGGGTGTGAGCTCAAAACCTCTCAAGCT : 131
Cm_FTL2 : GGCTACTTACAACAAC---AGGAAATTAGCAATGGGTGTGAGCTCAAAACCTCTCAAGTGTCAA : 131
Cmo_FTL1 : GGTTGCTTACAACCTCG---AGGAAAGTAAAGAAATGGCTGTGAGCTCAAAACCTGTCAAGT : 131
Cmo_FTL2 : GGCTACTTACAACAAT---AGGAAATTAGCAATGGGTGTGAGCTCAAAACCTCTCAAGTGTCAA : 131
Os_RFT1/FT : GTCTCAGCTATGGTGCA---AGGATCGTCTCCAATGGCTGCAGCTCAAGCCCTCATGTTGACCCA : 131
Os_Hd3A/FT : AGTCACTATGGTCC---AAGACCGTGTCCAATGGCTGCAGCTCAAGCCCTCATGTTGACCCA : 131
Os_FTL/FT- : GGTTGGCGTACGGAGCG---CGGAGGTTGGCCAAACGGCTGCAGCTCCGGCCCTCCGCCGTG : 131
Os_FT-L11 : CTGTGATGATGATGGG---AGGCCTGTGTTTAAATGGCAAGGAGTCCGTTCTCCGGCAGTCTCG : 131
Os_FT-L10 : CCGTCATGATGGTGATGATATGCCCGTCAATAAGCGCGTGGAGCTTCGCGCACCGGCGTGC : 134
      gt      Ta      a      T      aa GG      ga T      cC tc      gt

```

```

140          *          160          *          180          *          200
Os_MFT1    : CCCTCCCTCGTCCGCATC-----TCCGGCCGCCGCAACGACCTCTACACCTGATCATGACGGAC : 192
Os_MFT2    : GCCGCCCGCCGTGCAGATC-----GCCGGCAGGGTCAACGAGCTCTTCGCTCTGGTCATGACTGAT : 192
AT_MFT     : TCCTCCAAAAGTCAACATCTCGGGCCATTCCGAT-----GAGCTTTACACTCTCGTGATGACTGAC : 192
PT_MFT     : CCCTCCCAAAGTGACCATTTCTGGCCACTCTGAC-----GAGCTGTACACTCTGGTGATGACTGAT : 192
Os_FT-L8   : GAGGCCCAGCGTCCGAGGTG-----ATGGTGGAT : 156
AT_BFT     : TAAGCCTCGCGTTGAGATC---GGTGGCCAAGATCTTCGTTCTTCTTACCTTAATCATGATGGAC : 198
PT_BFT     : TAAACCTAGAGTTGAGATT---GGTGGTGAGGACATGAGGACTGCATATACACTAATCATGACAGAC : 198
NT_CET1    : TAAACCTCGTGTGAGATT---GGTGGCGAAGACATGCGATCTGCTTACACCTTATCATGACCGAC : 198
Bn_TFL1-1  : CAAGCCTAGGGTTGAGATC---CATGATGGTGATCTCAGATCTTCTTACACCTGGTGATGACAGAC : 195
AT_TFL1    : CAAGCCTAGGGTTGAGATC---CATGGTGGTGATCTCAGATCTTCTTCACTTGGTGATGATAGAC : 195
Os_FDR2/RC : TAAACCAAGAGTTGAGGTC---CAAGGGGGTGACCTGCGATCTTCTTACATGGTTATGACAGAC : 198
Os_FDR1    : TAAACCAAGAGTCGAGGTC---CAAGGGGGTGATATGCGTTCTTCTTACATGGTTATGACAGAC : 198
Os_RCN3    : CAAGCCGCGCGTCCGAGGTC---CAGGGCGGCACCTCAGGTCTTCTTACATGGTGATGACTGAC : 198
Os_RCN2    : CAAGCCGCGAGTCGAGGTT---CAGGGCGGCACCTGAGGTCTTCTTACACTGGTTATGACAGAT : 198
Am_CEN     : TACACCTAGGGTTGAGGTT---CATGGTGGTGATATGAGATCATTTTCACTCTGATAATGACAGAC : 198
Le_SP      : TAAACCTAGGGTTGAAGTT---CATGGTGGTGATCTCAGATCTTCTTACACTGATCATGATAGAT : 198
NT_CET2    : TAAACCTAGGGTTGAAGTT---CATGGAGGTGATTTGAGATCTTCTTTTACAATGATCATGATAGAC : 198
NT_CET4    : TAAACCTAGGGTTGAAGTT---CATGGAGGTGATTTGAGATCTTCTTTTACACTGATCATGATAGAC : 198
AT_ATC     : CAACCTAAGGTTGAAGTT---CATGGGGGTGACATGAGATCATCTTCACTTGGTTATGACTGAT : 198
PT_CEN1    : TAAACCTAAAAGTTGAGGTC---CATGGTGGTGATATGAGATCTTTTTCACCTGATCATGACAGAC : 198
PT_CEN2    : TAAACCTAAAAGTTGAGGTT---CATGGAGGTGATATGAGATCTTTTTCACCTGGTTATGACAGAC : 198
Os_FT-L9   : TAAACCAAGAGTAGATATT---GGTGGCACCACCTGAGGGTGTCTACACATGGTACTGGTGGAT : 195
Os_FT-L7   : CGAGCCGGCCGTCCAGATCACCAGAGCCCGCATGGGAGGGCGCTCTACACGCTCGTAATGGTGGAC : 198
Os_FT/FT-L : CCAACCAAGGATTTATATC---GAAGGTTCGCACATGAGGACGCTCTACACGCTGTAATGGTGGAC : 195
Os_FT-L6   : TGAACCAAGGATTTGAAATT---GCTGGCCGCACATAAGGAACCTTTACACTCTGGTGATGGTGGAT : 195
AT_TSF     : CAACCAATAGTTGAGATT---GGAGGAGACACTTCAGAAATTTCTACACTCTGGTTATGGTGGAT : 195
AT_FT      : CAAGCCAAGAGTTGAGATT---GGTGGAGAAACCTCAGGAACCTCTATACTTGGTTATGGTGGAT : 195
TA_FT      : GCAGCCCAGGGTTGAGGTG---GGCGGCAATGAGATGAGGACCTTCTACACACTCGTGATGGTAGAC : 195
Md_FT      : ACAACCTAGAGCTGATATT---GGTGGAGACGATCTCAGGACTTCTACACTCTGGTCATGGTGGAT : 195
Le_SP5G    : TCAACCTAGGGTTGACATT---GATGGAGACGATCTTCGTACTTTTACACTCTGATTATGGTGGAT : 195
Le_SFT/SP3 : CCAACCAAGGTTGAAGTT---GGAGGAGATGACCTACGTACCTTTTTCACCTTGGTTATGGTGGAC : 195
PT_FT1     : CCAACCTAGGGTTGATATT---GGCGGGGAAATCTAAGGACCTTCTACACTCTGGTTATGGTGGAC : 195
PT_FT2     : CCAACCTAGGGTTGATATC---GGTGGGGAAGATCTAAGGACCTTCTACACTCTGGTTATGGTGGAC : 195
Cm_FTL1    : CAAGCCAAGAGTTGAGATT---GGTGGCACTGACCTTCGCACCTTCTTCACTTGGTTATGGTGGAT : 195
Cm_FTL2    : CCAACCAAGAGTTGAGATT---GGTGGCACTGACCTTCGCACCTTCTTCACTTGGTTATGGTGGAT : 195
Cmo_FTL1   : CAAGCCAAGAGTTGAGATT---GGTGGCACTGACCTTCGCACCTTCTTCACTTGGTTATGGTGGAT : 195
Cmo_FTL2   : CCAACCAAGAGTTGAGATC---GGTGGCACTGACCTTCGCACCTTCTTCACTTGGTTATGGTGGAT : 195
Os_RFT1/FT : ACAACCTAGGGTTGAGGTC---GGTGGCAATGACATGAGGACCTTCTACACACTCGTGATGGTAGAC : 195
Os_Hd3A/FT : CCAACCTAGGGTTGAGGTC---GGCGGCAATGACATGAGGACATCTACACCTTGTGATGGTAGAC : 195
Os_FTL/FT- : CCAACCTAGGGTTGAGGTC---GGCGGCCCCGACATGCGCACCTTCTACACCTGGTGATGGTGGAT : 195
Os_FT-L11  : GAAACCTAGAGTTGAGATT---GGTGGCGATGATTTCCATTGCTTATACCTAGTTATGGTGGAT : 195
Os_FT-L10  : GAAACCGGTGTCGAAGTC---GGGGAGACGATCTTCGCTCGCATATACTCTGGTGATGGTGGAT : 198
a CC      gt ga T      gg      ga t g      t t cac t t aTG GA

```

```

                *           220           *           240           *           260
Os_MFT1      : CCGGACGCACCTAGCCCTAGCGAGCCATCCATGAGGGAGTTTCTCCACTGGATCGTGGTTAACATAC : 259
Os_MFT2      : CCAGATGCTCCTAGCCCCAGCCGAGCCGACTATGAGAGAGTGGCTTCACTGGCTGGTGGTTAACATAC : 259
AT_MFT       : CCGGACGCACCTAGCCCAAGCGAGCCGAACATGAGAGAATGGGTCCACTGGATTGTCGTGGATATTC : 259
PT_MFT       : CCTGATGCACCCAGCCCTAGTGAACCAGAAATGCCAGAGTGGGTTCATTGGATCGTTGCCGGACATTC : 259
Os_FT-L8     : CCAGATGCTCCAAACCCAAGCAATCCGACGTGAGAGAGTACTTACACTGGTTGGTGACAGATATTC : 223
AT_BFT       : CCGATGCCCGAGTCCCTAGTAACTCTTATAAGCGTGAATATCTGCATTGGATGGTGACAGATATTC : 265
PT_BFT       : CCTGATGCTCCAAACCCCAAGTATCCTTACCCTAAGAGAACAATCCACTGGATGGTCACTGACATTC : 265
NT_CET1      : CCAGATGTTCCAGTCCCTAGTATCCTTACTTGAAGGAACAATCCACTGGATTGTTACAGATATTC : 265
Bn_TFL1-1    : CCTGATGTTCCAAATCCTAGTGAACCCCTTTCTAAAAGAACGCCTGCATTGGCTCGTCATGAACATCC : 262
AT_TFL1      : CCAGATGTTCCAGTCCCTAGTGAACCCCTTTCTAAAAGAACAATCCACTGGATCGTTACAAACATTC : 262
Os_FDR2/RC   : CCAGATGTGCCAGGACCAAGTATCCTTATCTAAGGGAGCACCTTCACTGGATTGTTACTGATATAC : 265
Os_FDR1      : CCAGATGTGCCAGGACCAAGTATCCTATATCTAAGGGAAACCTTACATTGGATTGTAACAGATATAC : 265
Os_RCN3      : CCTGATGTGCCAGGACCTAGTATCCATACCTGAGGGAGCATCTTCACTGGATTGTTACTGATATTC : 265
Os_RCN2      : CCAGACCTGTGCCAGGACCTAGTATCCGTACCTGAGGGAGCACCTCCACTGGATCGTCACTGATATTC : 265
Am_CEN       : CCTGATGTTCCCTGCTCCTAGTATCCATACCTGAGGGAGCACTTGCCTGGATAGTCACAGATATCC : 265
Le_SP        : CCAGATGTTCCCTGCTCCTAGTATCCATATCTCAGGGAAACCTTACACTGGATTGTCACAGACATTC : 265
NT_CET2      : CCAGATGTTCCCTGCTCCTAGTATCCATATCTCAGGGAAACCTTACACTGGATTGTCACAGACATTC : 265
NT_CET4      : CCAGATGTTCCCTGCTCCTAGTATCCATATCTCAGGGAAACCTTACACTGGATTGTCACAGACATTC : 265
AT_ATC       : CCTGATGTTCCCTGGACCTAGTATCCTTATCTGAGAGAGCACTTGCCTGGATTGTTACCAGATATCC : 265
PT_CEN1      : CCAGATGTTCCAGGACCTAGTATCCATACCTGAGGGAGCACCTTACACTGGATAGTAACAGATATCC : 265
PT_CEN2      : CCTGATGTTCCCTGCTCCTAGTATCCATACCTCAGGGAGCACCTTACACTGGATTGTTAACTGATATCC : 265
Os_FT-L9     : CCAGATGCTCCAAACCCAAGCAACCCATCACCTAGGGGAGTATTTGCACTATCTCGTGATAGATATCC : 262
Os_FT-L7     : CCTGATGCACCTAGCCCCAGCAACCCCTTCCAAAAGGGAATACCTTCACTGGTTGGTAACTGACGTAC : 265
Os_FT/FT-L   : CCTGATGCACCAAGCCCAAGCAACCCCTACTAAAAGAGAGTACCTTCACTGGATTGGTGACAGACATTC : 262
Os_FT-L6     : CCTGACTCGCCAAGTCCAAGCAACCCCAAAAAAGAGAATACCTTCACTGGTTGGTGACAGACATTC : 262
AT_TSF       : CCAGATGTGCCGAGTCCAAGCAACCCCTACCAACGAGAATATCTCCACTGGTTGGTGACTGATATAC : 262
AT_FT        : CCAGATGTTCCAAAGTCCCTAGCAACCCCTCACCTCCGAGAATATCTCCATTGGTTGGTGACTGATATCC : 262
TA_FT        : CCAGATGCTCCAAAGTCCAAGCGATCCCAACCTTAGGGAGTATCTCCACTGGCTTGTGACAGATATCC : 262
Md_FT        : CCTGATGCACCCACCCCAAGTGAACCCCAACCTAAAAGGAATATTTGCATTGGTTGGTTACCAGATATTC : 262
Le_SP5G      : CCTGATGCTCCAAACCCCTAGCAACCCAAACCTGAGGGAAATATTTGCACTGGTTGGTGACAGATATCC : 262
Le_SFT/SP3   : CCTGATGCTCCAAAGTCCGAGTGAACCCAAATCTGAGAGAATACCTTCACTGGTTGGTGACAGATATTC : 262
PT_FT1       : CCTGATGCACCCAGCCCAAGTGAACCCAGCCCTAAGAGAATATTTGCATTGGTTGGTGACTGATATTC : 262
PT_FT2       : CCTGATGCACCCAGCCCAAGTGAACCCAAACCTCAGAGAATACTTGCATTGGTTGGTGACTGATATTC : 262
Cm_FTL1      : CCGGACGCTCCTAGCCCTAGCGATCCCAATCTAAGAGAATACTTGCATTGGTTAGTGACCGATATTC : 262
Cm_FTL2      : CCTGATGCTCCTAGCCCTAGTATCCTTAATCTAAGGGAAACTTGCATTGGTTGGTGACTGATATTC : 262
Cmo_FTL1     : CCGGACGCTCCTAGCCCTAGCGATCCCAATCTAAGAGAATACTTGCATTGGTTAGTGACCGATATTC : 262
Cmo_FTL2     : CCTGATGCTCCTAGCCCTAGTATCCTTAATCTAAGGGAAACTTGCATTGGTTGGTGACTGATATTC : 262
Os_RFT1/FT   : CCGGATGCTCCGAGCCCAAGCAACCCCTAACCTTAGGGAGTATCTACACTGGCTGGTGACCGATATTC : 262
Os_Hd3A/FT   : CCAGATGCACCAAGCCCAAGTGAACCCCTAACCTTAGGGAGTATCTACATTGGTTGGTGACTGATATTC : 262
Os_FTL/FT-   : CCGGACGCGCCGAGCCCGAGCGATCCAAACCTCAGGGAGTACCTGCCTGGCTGGTGACCGATATTC : 262
Os_FT-L11    : CCTGATGCTCCTAATCCAGCAACCCCAACCTGAGGGAAATACCTTCACTGGATTGGTGACTGATATTC : 262
Os_FT-L10    : CCTGATGCACCTAACCCCTAGCAATCCAACTCTGAGGGAAATACCTCCACTGGATTGGTGACTGATATTC : 265
CC GAtg CC g CC AG A CC t ag GA a T CA Tgg T GT ac gA aT C

```

```

*           280           *           300           *           320           *
Os_MFT1    : CGGGGGAACACATGCATCTAAAGGTGAGGAGATGGTGGAGTACATGGGGCCACGGCCGACGGTGGG : 326
Os_MFT2    : CAGGTGGAACACATCCTTCTCAAGGGGATGTGGTGGTGCCGTACATGGGGCCACGGCCGCCGGTGGG : 326
AT_MFT     : CCGGAGGCACAAATCCCTCAAGAGGAAAAGAGATACCTTCCAATACATGGAACCAAGGCCACCAGTGGG : 326
PT_MFT     : CTGGGGGCACAAACCTACTCGAGGGAAAGAGATCCTTTCCATGTTGGGCCCTCGTCCGCCGGTGGG : 326
Os_FT-L8   : CTGGAACAACCTCATGCGAACATATGGGCGCGAGGTGGTGTGTACGAGAGGCCCCGGCCAGCGCGGG : 290
AT_BFT     : CCGGACAAACCATGCTTCTTTGGGAGAGAGATAGTGAGATATGAGAGCCCTAAACCCGGTGGCGGG : 332
PT_BFT     : CTGGCACAACCTCATGTTTCCCTTTGGAAAGGAAATGTGAGCTATGAGACTCCAAAGCCCGTGGTTGG : 332
NT_CET1    : CTGGTCCACTCATTCCTCGTTTGGAAAGGAAATAGTGAGCTACGAGAGCCCAAAGCCAGTGATTGG : 332
Bn_TFL1-1  : CCGCACAACACATGCTACATTTGGAAAAGAGGTGGTGGCTATGAGCTGCCAAAGCCAAACATAGG : 329
AT_TFL1    : CCGCACAACACATGCTACGTTTGGCAAAGAGGTGGTGGCTATGAATTGCCAAGGCCAAGCATAGG : 329
Os_FDR2/RC : CTGGGACAACGATGCTTCTTTGGACGCGAGGTATAAGCTATGAGAGTCCAAAGCCGAACATTGG : 332
Os_FDR1    : CTGGAACAACGATGCTTCTTTGGACGGGAAATCATAAGCTATGAGAGCCCAAAGCCAAATATTGG : 332
Os_RCN3    : CTGGACTACTCATGCTTCTTTTGGGAGGGAGGTGGTGGCTACGAGAGCCCGCGGCCAAACATCGG : 332
Os_RCN2    : CTGGCACCACCTCATGCTTCCCTTTGGGAGGGAGGTGGTGGCTACGAGAGCCCGAAGCCCAACATTGG : 332
Am_CEN     : CAGGGACCACCTCATTCCTCAATTCGGCAAAGAGTAGTGAGCTATGAGATGCCAAGGCCGAACATAGG : 332
Le_SP      : CAGGCACACAGATGCTCTTTTGGAAAGAGAGTGGTGGCTATGAAATGCCAAGCCAAATATTGG : 332
NT_CET2    : CAGGCACACAGATGCTCGTTTGGGAAAGAAATAGTTGGCTATGAAATGCCAAGCCAAATATTGG : 332
NT_CET4    : CAGGCACACAGATGCTCGTTTGGGAGAGAAATAGTTGGCTATGAAATGCCAAGCCAAATATTGG : 332
AT_ATC     : CGGGGACGACTCATGTATCAATTTGGTAAAGAGATAATCGGGTACGAGATGCCTCGGCCAAACATAGG : 332
PT_CEN1    : CAGGCACCACACATGCCACAATTCGGAAAGGAAAGTGGTGAACATGAGATGCCAAGGCCAATACATCGG : 332
PT_CEN2    : CAGGCACCACACATGCCACAATTTGGAAAGGAAAGTGGTGAACATGAGATGCCAAGGCCAATACATCGG : 332
Os_FT-L9   : CAGGAACAACCTGAGTCAACTTTCTGTCAGACCTCATGCTTATGAAAGACCGGAACCTGAGATATGG : 329
Os_FT-L7   : CAGAAGGAGGCATACGAGTAAAGGACGGAGGTGGTGGCGTACGAGAGCCCGCGGCCGACAGCGGG : 332
Os_FT/FT-L : CAGAGACCACCTCATGCCAGATTTGGTAATGAGATGTCCCTATGAGAGCCACGCCCAACTGCAGG : 329
Os_FT-L6   : CAGAATCGGCAATGCTAGTATGGAATGAAAGTGTGAGTATGAAAGCCAAAACCAACTGCAGG : 329
AT_TSF     : CTCCCACCACCTGAAATGCCCTTTGGCAATGAGGTGGTGTGCTACGAGAGTCCACGTCCTCCCTCGGG : 329
AT_FT      : CTCTACAACCTGAAACAACCTTTGGCAATGAGATGTGTGTACGAAAATCCAAGTCCCCTGCAGG : 329
TA_FT      : CCGGTACAACCTGTGCGTCTTTGGGCAGGAGGTGATGTGTACGAGAGCCCTCGTCCGACCATGGG : 329
Md_FT      : CAGCAACTACTCGGGCAAGCTTTGGGCAAGAGATCGTGTGTATGAAAGTCCACGGCCAAACAGTGGG : 329
Le_SP5G    : CAGCAGCCACAGAGCAACCTTTGGCAATGAAAGTCGTGGGCTACGAGAGCCACGACCTCAATGGG : 329
Le_SFT/SP3 : CAGCTACCACAGTTCAAGTTTGGGCAAGAAATAGTGAGCTATGAAAGTCCAAAGACCATCAATGGG : 329
PT_FT1     : CAGCAACAACCTGGGCAAGCTTTGGCCATGAAACTGTGTGTATGAGAGCCGAGGCCGACCAATGGG : 329
PT_FT2     : CAGCAACTACCGGGCAAACCTTTGGGCAAGAGGTGTGTGTACGAGAGCCAAAGCCGACAGCGGG : 329
Cm_FTL1    : CAGCTACAACCGAGGCAACCTTTGGACAAGAGATAGTGTGTACGAGAATCCAAGACCAACCGTGGG : 329
Cm_FTL2    : CAGCTACAACCTGAGGCAACCTTTGGTCAAGAGATCGTGTGTATGAGAGCCAAAGACCCACGGTGGG : 329
Cmo_FTL1   : CAGCTACAACCGAGGCAACCTTTGGACAAGAGATAGTGTGTACGAGAATCCAAGACCAACCGCGGG : 329
Cmo_FTL2   : CCGCTACAACCTGAGCGACCTTTGGTCAAGAGATCGTGTGTATGAGAGCCGAGGCCAACCGTGGG : 329
Os_RFT1/FT : CTGGTACCACCTGAGCAACATTTGGGCAAGAGGTGATGTGTACGAGAGCCAAAGCCAAACCATGGG : 329
Os_Hd3A/FT : CTGGTACTACTCAGCGTCAATTTGGGCAAGAGGTGATGTGTACGAGAGCCAAAGCCAAACCATGGG : 329
Os_FTL/FT- : CAGCTACCACAGAGTCTCTTTTGGGACAGAGGTGGTGTGTACGAGAGCCCGCGGCCGGTGTCTGGG : 329
Os_FT-L11  : CATCATCGACGACGATAGCTTTGGGCGGGAGATCGTAACATACGAAAGCCAAAGCCCAACCATGGG : 329
Os_FT-L10  : CGCTTCAACCATGCTACAATATGGGAGGGAGGTGGTGTGTACGAGAGCCGAACCCGACGACGGG : 332
C g   c a c g           t t g G   G a t T   T A g a a C C   C c           G G

```

```

      340          *          360          *          380          *          400
Os_MFT1 : GATACACAGGTACGTGCTGGTGGTGTACGAGCAGAAGGCGCCTTCGTGGACGGGCGGCTGATGCCG : 393
Os_MFT2 : GATCCACCGCTACCTGATGGTGGTGTCCAGCAGAAGGCGCC-----GTGGGGCGCCG---CCG : 384
AT_MFT : GATTCACCGTTACATATTTGGTACTTTCCGGCAAAACTCACCAGTGGGTCTGATGGTGCAG---CAG : 390
PT_MFT : AATTCATCGCTACATACTGGTGGTGTCCAGCAGAAGATGCCGCTGGGGAGCATGGTGGAA---CCA : 390
Os_FT-L8 : GATCCACCGGGTGGCGGTGGTGGTGTCCGGCAGATGGGCGCC-----GGCGGCGTGGACCAGCCG : 351
AT_BFT : AATACACAGATACGCTTTTGGCTATTTCAAACAGAGAGGGAGG-----CAAGCTGTGAAGGCAGCG : 393
PT_BFT : TATCCATAGATATGTGTTCACTTATTTAAACAGAGAGGAAGG-----CAAACGTGAGGGCGCCA : 393
NT_CET1 : GATTCACCGATATGTGTTACTATTGTATAAACAAAGCGGAAGG-----CAAACAGTGAAG---CCA : 390
Bn_TFL1-1 : GATACACAGGTACGTGTTTGTCTGTTCAGGCAGAAGCAAAACA-----CGTGTAAAGTTC---CCA : 387
AT_TFL1 : GATACATAGGTTTGTGTTTGTCTGTTCAGGCAGAAGCAAAACA-----CGTGTATCTTT---CCT : 387
Os_FDR2/RC : CATCCATAGGTTCAATTTTGTGCTTTCAAAGCAGAAGCGCAGG-----CAAACGTAAATT---GTG : 390
Os_FDR1 : TATCCACAGGTTCTTTTGTGCTTTCAAAGCAGAAGCGTAGG-----CAGGCTGTAGTT---GTG : 390
Os_RCN3 : CATCCACAGGTTCACTCTGGTGGTGTCCGGCAGAAGCGCCCG-----CAGGCGGTGAGC---CCG : 390
Os_RCN2 : CATCCACAGGTTCTCTCTGGTGGTGTTCAGGCAGAAGCGCCCT-----CAGGCGGTGACC---CCG : 390
Am_CEN : GATCCACAGGTTGTATTTCTCTGTTCAAACAGAAGAAAACA---GGGCAGGCGATGTTG---AGC : 393
Le_SP : AATCCACAGGTTGTATTTTGTGCTTTCAAAGCAGAAGAAAAGG-----CAAACAATATCGAGTGCA : 393
NT_CET2 : AATTCACAGGTTGTATTTCTGCTGTTCAGGCAGAAGAAGAGG-----CAAACAGTATTGACTGCA : 393
NT_CET4 : AATCCACAGGTTGTATTTCTGCTGTTCAGGCAGAAGAAGAGG-----CAAACATATTGAGTGCA : 393
AT_ATC : GATCCACCGCTTTGTGATTGTGTTCAGGCAGACCCGTACA-----GGAAGTGTGGTGTCTGTG : 393
PT_CEN1 : GATCCACAGGTTGTATTACCTCTTTTCAGGCAGAAAGGAAACA-----CAAACAGTGAGC---ACA : 390
PT_CEN2 : GATCCACAGGTTGTATTTCTGCTTTCAAAGCAGAAGGGAAGG-----CAAACAGTGACC---ACT : 390
Os_FT-L9 : TATCCACCGGATGATTTTGTGTTATTCGCACAACCTTGGCAGG-----GGAACCGTTTTTT---GCA : 387
Os_FT-L7 : GATCCACCGGTTGTTGTTCACTGTTCGGCAGACAGTGCCE-----CAGTCCATCTAC---GCG : 390
Os_FT/FT-L : CATCCATCGCTTCTGTTCACTCTATTCAGGCAGTCAGTCAGG-----CAGACCACCTAT---GCA : 387
Os_FT-L6 : GATACATCGTTTTGTCTTTAATTTATTTTCGCACAATATGTACAA-----CAGACTATTTTAT---GCA : 387
AT_TSF : AATTCATCGTATTGTGTTGGTATTTTCGGCAACTCGGAACA-----CAAACGGTTTTAT---GCA : 387
AT_FT : AATTCATCGTGTCTGTTTATATTGTTTCGACAGCTTGGCAGG-----CAAACAGTGTAT---GCA : 387
TA_FT : GATCCACCGCTTCTGCTCTGCTACTTTCCAGCAGCTCGGGCCG-----CAGACGGTGTAC---GCC : 387
Md_FT : GATTCATCGCTTTCTTTTGGTGGTGTTCGGCAATTGGGTAAG-----CAAACGGTGTAT---GCT : 387
Le_SP5G : AATCCATCGTTATAATTTCTGTTGTATCGACAATTGGGCTGC-----GATGCCATTCGAT---GCA : 387
Le_SFT/SP3 : AATACATCGATTTGTATTTGTATTTTCAGACAATTAGGTCGG-----CAAACAGTGTAT---GCT : 387
PT_FT1 : AATTCATCGGTTTGTTTTCTGTTTTCGGCAACTGGGCAGG-----CAAACGTGTAT---GCC : 387
PT_FT2 : AATTCATCGGTTTGTTTTGTGTTTTCGGCAACTAGGCAGG-----CAAACAGTGTAT---CCC : 387
Cm_FTL1 : TATCCACCGTTTTGTGCTGGTCTGTTCCGGCAGCTCGGAAGG-----CAAACGGTGTAT---GCT : 387
Cm_FTL2 : TATCCATCGTCTCTGCTGGTGTGTTTCGACAGCTTGGAAAG-----CAAACGGTGTAC---GCT : 387
Cmo_FTL1 : TATCCACCGTTTTGTGCTGGTCTGTTCCGGCAGCTCGGAAGG-----CAAACGGTGTAC---GCT : 387
Cmo_FTL2 : TATCCATCGTCTCTGCTGGTGTGTTTCGACAGCTTGGAAAG-----CAAACGGTGTAC---GCT : 387
Os_RFT1/FT : GATCCACCGGCTGTTGTTCTGCTGTTCCAGCAGCTGGGGCC-----CAGACGGTGTAC---GCA : 387
Os_Hd3A/FT : GATCCACCGGCTGTTGTTCTGCTGTTCCAGCAGCTGGGGCC-----CAGACAGTGTAC---GCG : 387
Os_FTL/FT- : GATCCACAGGCTGTTGTTCTGCTGTTTCGACAGCTGGGGCC-----CAGACGGTGTAC---GCA : 387
Os_FT-L11 : CATCCACCGCATCTGATGGTGTGTTATCAGCAGCTTGGGCC-----GGCACGGTGTTC---GCG : 387
Os_FT-L10 : GATCCACAGGATGTTGCTGGTGGTGTTCGGCAGCTGGGGAGG-----GAGACGGTGTAC---GCG : 390
      AT CA G gt t t T Tt CA g c t c

```

```

*          420          *          440          *          460
Os_MFT1 : CGGGCGGAC-----AGGCCAACTTCAACACAAAGAGCATTCGGCGGTACCATCAGCTCGGCC : 451
Os_MFT2 : CCGGACGAGGACGCCGCGCGGCCAGGTTCAACACGCGCGCCTTCGCCGACCGCCACGACCTCGGCC : 451
AT_MFT : CCTCCATCA-----CGAGCCAATTTCAACACACGAATGTTTCGTTGGACATTTTCGATCTTGGTC : 448
PT_MFT : CGCGAGAAC-----CGTTCTCATTTCAACACTCGACTCTATGCTGCTCATTTGGACCTGGGCC : 448
Os_FT-L8 : CGGCTGCTC-----CGCCACAACTTCTCCACCCGCGGCTTCGCCGACGACCACGCCCTCGGCG : 409
AT_BFT : CCGGAAACT-----AGAGAGTGTTCACACAAACGCTTCTCTTCTTACTTTGGTCTTTCTC : 451
PT_BFT : CCAGCTTCA-----AGAGACTGTTCAACACTAGAATGTTTCGAGGAGAAAATGGATTGGGCC : 451
NT_CET1 : GCAGCAACA-----AGAGACCATTTCAACACTCGAAGGTATACGGCTGAGAATGGATTGGGAA : 448
Bn_TFL1-1 : AGCAATATT---ATTTTCGAGGGATCAGTTCAACACTCGTGAATTTTCGATCGAGAATGATCTTGGTC : 451
AT_TFL1 : AATATCCTT-----TCGAGAGATTCACTTCAACACTCGTAAATTTTCGGTTCGAGTATGATCTTGGTC : 448
Os_FDR2/RC : CCATCCCTC-----AGGACCATTTCAACACCCCGGTTTCGCCGAGGAGAATGATCTTGGCC : 448
Os_FDR1 : CCATCCTCT-----AGGATCATTTCAATACACGCCAGTTTCGCTGAGGAGAACGAACTTGGCC : 448
Os_RCN3 : CGCCGTCG-----AGGACCGCTTCAGCACCCGCCAGTTTCGCCGAGGACAACGACCTCGGCC : 448
Os_RCN2 : CCATCCTCC-----AGGACTACTTCAGCACCCGCCGTTTCGCCGCCGACAACGACCTCGGCC : 448
Am_CEN : CCACCAGTA---GTGTGCAGGGATGGAATTCACACAGGAAAATGAAATGGGCC : 457
Le_SP : CCAGTGTC-----AGAGTCAATTTAGTAGTAGAAAATTTTCAGAAGAAAATGAACTTGGCT : 451
NT_CET2 : CCTCTCTCC-----AGGATCGATTTAATACGCGTAAATTCGACAGAAGAAAATGAGCTTGGGT : 451
NT_CET4 : CCTCTCTCC-----AGGATCGATTTAATACGCGCAAATTTCTCAGAAGAAAATGAGCTTGGGT : 451
AT_ATC : CCATCTTAC-----AGAGCCAAATTCACACTCGAGAGTTTCGCTCATGAGAACGATCTTGGCC : 451
PT_CEN1 : CCATCCTCA-----AGGACAAAATTTAACACGAGGAAAATTTGCTGAAGAAAATGAGCTTGAAC : 448
PT_CEN2 : CCAGCTTCA-----AGGACAAAATTTAACACGAGGAAAATTCGCTGAAGAAAATGAGCTTGGCC : 448
Os_FT-L9 : CCAGAGATG-----CGACACAACTTCAATTGTAGAAGGTTTCGCAACAATACCATCTGGACA : 445
Os_FT-L7 : CCGGGGTGG-----CGTCCAACTTCAACACAGGGACTTCGCCGCCCTGCTACAGCCTCGGCT : 448
Os_FT/FT-L : CCAGGGTGG-----CGCCAAAATTTCAATACAAGGGACTTTTCGCTGAGCTCTACAACCTCGGTT : 445
Os_FT-L6 : CCAGGATGG-----AGACCAAATTTCAATACAAGAGATTTTTCGCACTGTATAATCTTGGAC : 445
AT_TSF : CCGGGGTGG-----CGCCACAGTTCAACACTCGTGAGTTTCGCTGAGATCTACAATCTTGGTC : 445
AT_FT : CCAGGGTGG-----CGCCAGAACTTCAACACTCGCGAGTTTCGCTGAGATCTACAATCTCGGCC : 445
TA_FT : CCGGGGTGG-----CGCCAGAACTTCAACACAGGGACTTCGCCGAGCTCTACAACCTCGGCC : 445
Md_FT : CCGGGATGG-----CGCCAGAACTTCAATACAGAGACTTCGCCGAGCTTTATAATCTTGGAT : 445
Le_SP5G : CCGGACATAATCGATTCTAGACAAAATTTCAACACAAAGAGACTTTGCTAGGTTTACAATCTAGGTT : 454
Le_SFT/SP3 : CCAGGATGG-----CGTCAGAATTTCAACACAAGAGATTTTCAGAACTTTATAATCTTGGTT : 445
PT_FT1 : CCTGGGTGG-----CGCCAGAACTTCAACACAGAGACTTTGCTGAGGCTTACAATCTTGGAT : 445
PT_FT2 : CCTGGGTGG-----CGCCAGAATTTCAACACAGGGACTTTGCTGAATTTACAATCTAGGTT : 445
Cm_FTL1 : CCTGGGTGG-----CGCCAGAACTTCAACACAGACACTTTGCAGAGCTTTACAATCTTGGTT : 445
Cm_FTL2 : CCTGGGTGG-----CGCCAGAACTTCAACACAAGAGACTTTGCAGAGCTTTACAATCTTGGCT : 445
Cmo_FTL1 : CCTGGGTGG-----CGCCAGAACTTCAACACAGACACTTTGCAGAGCTTTACAATCTTGGTT : 445
Cmo_FTL2 : CCTGGGTGG-----CGCCAGAACTTCAACACAGAGACTTTGCAGAGCTTTACAATCTAGGCT : 445
Os_RFT1/FT : CCGGGGTGG-----CGCCAGAACTTCAACACAGGAACTTCGCCGAGCTCTACAACCTCGGCT : 445
Os_Hd3A/FT : CCGGGGTGG-----CGTCAGAACTTCAACACAAGGACTTCGCCGAGCTCTACAACCTCGGCT : 445
Os_FTL/FT- : CCGGGGTGG-----CGCCAGAACTTCAACACCCGCGACTTCGCCGAGCTCTACAACCTCGGCC : 445
Os_FT-L11 : CGCAGGTG-----CGTCAGAACTTCAACCTGCGCAGTTTCGCCGCCGCTTTCAACCTCGGCA : 445
Os_FT-L10 : CCGGCGGTG-----CGCCACAACTTCAACACCCGCGCTTCGCCGCCGCTACAACCTCGGCG : 448
cc          G a a Ttca cac g Tt gC g a a cT gg

```

```

*           480           *           500           *           520
Os_MFT1    : TCCCCACCGCCCTCGTCCACTTCAACTCCAGAGGGAGGCCCCCAAC---CCCCGCCGC : 507
Os_MFT2    : TCCCCGTGCGCCCCCTCTACTTCAACGCCCAGAAGGAGCCCCCCAAC---CCCCGCCGC : 507
AT_MFT     : TACCTGTGGCCACTGTCTATTTCAACGCCCAAAAGGAACCTGCTTCA---CCCCAGACGC : 504
PT_MFT     : TGCCAGTGGCTGAGTACTTTTAATGCAAGAGAGAAACTGCTGCG---AGAGAGGC : 504
Os_FT-L8   : CCCCCGTGCGCCGCCCCTTCTTCACTGCAAGCCCAGGGGGCCACCCGGCCCCGCCGC : 468
AT_BFT     : AACCTGTGCTGCTGTTACTTCAACGCCCAAACTGAAACTGCTCT---CCCAGACGT : 507
PT_BFT     : TGCCAGTGGCTGAGTACTTTTAATGCAAGAGAGAAACTGCTGCG---AGAGAGGC : 507
NT_CET1    : GCCCAGTGCGCTGCTACTTCAATGCCCAGAGAGAAACTGCTGCC---AGAAGAAGA : 504
Bn_TFL1-1  : TCCTGTGCGCGCTGTCTTCTTCAACGCTCAGAGAGAAACCCCCATCT---CCCCAGACGT : 507
AT_TFL1    : TCCTGTGCGCGCGCTTCTTTAACGCAAAAGAGAAACCCCCTGCA---CCCCAAACGC : 504
Os_FDR2/RC : TTCCTGTGCGCTGCTCTACTTCAATGCCAGAGAGAGACTGCCAGCC---AGAGAGGC : 504
Os_FDR1    : TTCCTGTGCGCTGCTCTACTTCAATGCTCAGAGAGAGACTGCTGCC---AGAGAGGC : 504
Os_RCN3    : TCCCCGTGCGCCGCCGTCTACTTCAACGCGAGCCGAGACCCCCGCT---CCCCGCCGC : 504
Os_RCN2    : TCCCCGTGCGCCGCCGTCTACTTCAACGCGAGCCGAGAGACCCCCGCT---CCCCGCCGC : 504
Am_CEN     : TCCTGTGCGCTGCTCTTCTTCAATTGCCAGCCGAAACCCCCTGCC---AGAAGGC : 513
Le_SP      : CACAGTGCTGCTGTTTCTTCAATTGTCAGAGGAAACTCCCGCT---AGAAGGC : 507
NT_CET2    : CTCCTGTGCGAGCTTTTCTTCAATTGCCAGAGGAAACTCCCTGCC---AGAAGGC : 507
NT_CET4    : CTCCTGTGCGAGCTTTTCTTCAATTGCCAGAGGAAACCCCCTGCC---AGAAGGC : 507
AT_ATC     : TCCCCGTGCGCGCTGTTTCTTCAACTGCCAGCCGAGACCCCCGCT---AGAGCCCGT : 507
PT_CEN1    : TGCCGGTAGCAGCTGTCTTCTTCAATGCTCAAAGGAAACAGCTGCA---AGAGACGT : 504
PT_CEN2    : TGCCGGTAGCCGCTGTCTTCTTCAATGCCAAAGGAAACAGCGGCG---AGAGAACGT : 504
Os_FT-L9   : TT---GTGGCCGTACATATTTCAACTGCCAAAGGAAAGCCCGCTCTGGTGCAAGAAGG : 501
Os_FT-L7   : CCCCCGTGCGCCGCCCCTACTTCAACTGCCAGAGGGAGGGCCCGTGCGGCGCCGGAGT : 507
Os_FT/FT-L : CGCCGGTGCGCCGCCGCTCTTCTTCAACTGCCAGAGGGAGAACCGTGTGGAGCAAGAAGA : 504
Os_FT-L6   : CTCCTGTGGCAGAGTGTCTTCAATTGCCAGAGGGAGAACGGATGTGGAGCACAGACGG : 504
AT_TSF     : TTCCTGTGGCTGCTCTTACTTCAACTGCCAGAGGGAGAACGGATGCTGTGGGGCAAGAAGA : 504
AT_FT      : TTCCGTGGCCGAGTTTTCTTCAATTGTCAGAGGGAGAGTGGCTGCGGAGCAAGAAGA : 504
TA_FT      : CGCCTGTGCGCGCTCTACTTCAACTGCCAGCCGGTGAGGCCCGTCCGGCGCCCAGGAGG : 504
Md_FT      : TACCGGTGTCTCTCGTCTATTTTAACTGCCAAAGGGAGGGCCCGTCCGGTGCAAGGAGA : 504
Le_SP5G    : TGCCGTTGCTGCTGTTACTTCAATTGCAATAGGGAAGGTGGTACCGGTGTCGTGCG : 513
Le_SFT/SP3 : TACCGTTGCTGCTGTCTATTTTAATTGTCAAAGAGAGAGTGGCAGTGGTGCACGTAGA : 504
PT_FT1     : CGCCAGTGGCTGCTGTTATTTCAACTGCCAGAGGGAGAGTGGCTCTGGTGTCTAGGAGG : 504
PT_FT2     : CGCCAGTGGCTGCTGTTATTTCAACTGCCAGAGGGAGAGTGGCTCCGGTGCAAGGAGA : 504
Cm_FTL1    : CGCCAGTGCGCCGCCGTCTATTTCAATTGCCAAAGGGAAATGGCTCCGGTGCAAGGAGA : 504
Cm_FTL2    : TGCCGGTGGCAGCCGTTTATTTCAATTGCCAAAGGGAAAGTGGTCTGGTGCAAGGAGA : 504
Cmo_FTL1   : CGCCGGTGCGCCGCCGTTTACTTCAATTGCCAAAGGGAAATGGCTCCGGTGCAAGGAGA : 504
Cmo_FTL2   : TGCCGGTGGCCGCCGTTTATTTCAATTGCCAAAGGGAAAGTGGTCTGGTGCAAGGAGA : 504
Os_RFT1/FT : CGCCGGTGCGCCGCCGTCTACTTCAACTGCCAGCCGGAGGCCCGTCCGGCGCCCAGGAGG : 504
Os_Hd3A/FT : CGCCGGTGCGCCGCCGTCTACTTCAACTGCCAGCCGGAGGCCCGTCCGGCGCCCAGGAGG : 504
Os_FTL/FT- : TCCTGTGCGCGCGCTCTACTTCAACTGCCAGAGGGAGTCTGAACCGGAGCAAGAAGA : 504
Os_FT-L11  : AGCCGGTGGCCGCCGATGTACTTCAACTGCCAGCCCCCGACAGGCACAGGTGGCAGGAGG : 504
Os_FT-L10  : CGCCCGTGCGCCGCCGTCTACTTCAACTGCCAGCCCCAGGCCCGTCCGGCGCCGGAGG : 507
cc gt gC gc gt t TtcAa cA g ga G g g G

```

**Supplemental Figure 4:** Nucleotide sequence alignment of 40 FT-TFL family members in Angiosperms. The alignment is based on a protein sequence alignment generated using Muscle 3.52. Amino acids highlighted in dark brown are 100% similar; in dark grey are at least 80% similar; in light grey are at least 60% similar.
