# Supplementary material
Source: PubMed Central journal article supplement (PMC1913722)
Supplement: plntcell_tpc.107.051920_5.pdf [file plntcell_tpc.107.051920_5.pdf]

**(A) SEQUENCE COVERAGE OF Cm\_FTL1**

MPRNRDPLVVGRVIGDVVDSFSRSISIRVVYDSREVNNGCELKPSQAVNKPRVEIGGTDLR~~TF~~FTLVM  
VDPDAPSPSDPNLREYLHWLVTDIPATTEATFGQEIVCYENPRPTVGIHRFVLVLFRLGRQTVYAPG  
WRQNFNTRHFAELYNLGPVAAVYFNCQRENGSGGRRRAGDECS

**Amino acid sequence coverage: 31.7%**

Peptide observed:

| Sequence                | charge | Xcorr | ΔCn  |
|-------------------------|--------|-------|------|
| DPLVVGR                 | 2      | 2.55  | 0.88 |
| VEIGGTDLR               | 2      | 2.80  | 0.79 |
| VEIGGTDLR               | 1      | 1.60  | 0.90 |
| QTVYAPGWR               | 2      | 2.25  | -    |
| VIGDVVDSFSR             | 2      | 2.16  | -    |
| TFFTLVMoxVDPDAPSPSDPNLR | 3      | 3.81  | -    |
| TFFTLVMoxVDPDAPSPSDPNLR | 2      | 4.27  | -    |
| TFFTLVMVDPDAPSPSDPNLR   | 2      | 3.86  | -    |
| TFFTLVMVDPDAPSPSDPNLR   | 3      | 3.13  | -    |

**(B) SEQUENCE COVERAGE OF Cm\_FTL2**

MPRRDRDPLVVGRVIGDVIDSFTKSISIRATYNNREISNGCELKPSQVVNQPRVEIGGTDLR~~TF~~FTLVMV  
DPDAPSPSDPNLREYLHWLVTDIPATTGANFGQEIVCYESPRPTVGIHRLVLVLFRLGRQTVYAPGR  
QNFNTRDFAELYNLGLPVAAVYFNCQRESGSGGRRRTQDDF

**Amino acid sequence coverage: 74.9%**

Peptide observed:

| Sequence                      | charge | Xcorr | ΔCn  |
|-------------------------------|--------|-------|------|
| DPLVVGR                       | 2      | 2.55  | 0.88 |
| DRDPLVVGR                     | 2      | 2.74  | 0.37 |
| EISNGCELKPSQVVNQPR            | 3      | 4.26  | -    |
| EISNGCELKPSQVVNQPR            | 2      | 4.55  | -    |
| VEIGGTDLR                     | 2      | 2.85  | 0.86 |
| VEIGGTDLR                     | 1      | 1.63  | 0.83 |
| QTVYAPGWR                     | 2      | 2.25  | -    |
| VIGDVIDSFTK                   | 2      | 3.44  | 0.38 |
| TFFTLVMoxVDPDAPSPSDPNLR       | 3      | 3.81  | -    |
| TFFTLVMoxVDPDAPSPSDPNLR       | 2      | 4.27  | -    |
| LVLVLFRL                      | 1      | 1.67  | 0.96 |
| TFFTLVMVDPDAPSPSDPNLR         | 2      | 3.86  | -    |
| TFFTLVMVDPDAPSPSDPNLR         | 3      | 3.13  | -    |
| EYLHWLVTDIPATTGANFGQEIVCYESPR | 3      | 4.28  | -    |
| DFAELYNLGLPVAAVYFNCQR         | 3      | 7.52  | 0.99 |
| DFAELYNLGLPVAAVYFNCQR         | 2      | 4.46  | -    |

**Supplemental Figure 5:** Typical sequence coverage and identified peptides for Cm\_FTL1 and Cm\_FTL2 from LC-MS/MS data analysis. SEQUEST search was performed with Xcorr cut-off values of 1.5, 2.0, and 2.5 for singly, doubly, and triply charged ions. All the matched tandem MS spectra were subjected to manual validation. Sequence coverage of 74.9% and 31.7% was obtained for Cm\_FTL1 and Cm\_FTL2, respectively.
