# Supplementary material
Source: PubMed Central journal article supplement (PMC1913722)
Supplement: plntcell_tpc.107.051920_6.pdf [file plntcell_tpc.107.051920_6.pdf]

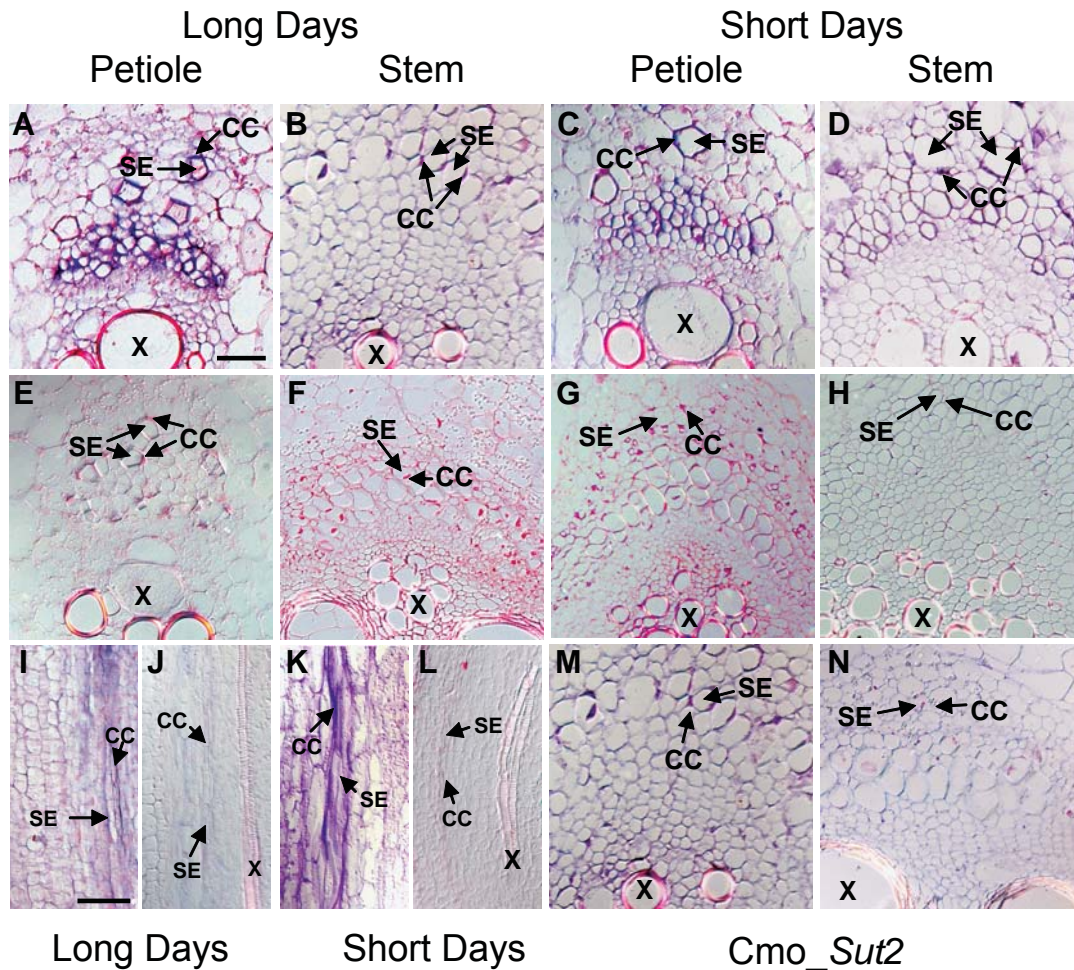

**Supplemental Figure 6:** Phloem Specific Expression of *Cmo\_FTL1/FTL2* in Plants Grown Under Non-inductive LD and Inductive SD Conditions. (A) - (D) Petiole and stem transverse sections hybridized with an *in vitro*-transcribed antisense RNA probe that recognizes both *Cmo\_FTL1* and *Cmo\_FTL2*. (E) – (H) Petiole and stem transverse sections hybridized with an *in vitro*-transcribed sense RNA probe to *Cmo\_FTL1/FTL2*. (I) and (K) Petiole and stem longitudinal sections hybridized with an *in vitro*-transcribed antisense RNA probe that recognizes both *Cmo\_FTL1* and *Cmo\_FTL2*. (J) and (L) Petiole and stem longitudinal sections hybridized with an *in vitro*-transcribed sense RNA probe to *Cmo\_FTL1/FTL2*. (M) and (N) Petiole transverse sections hybridized with antisense and sense probes to *Cmo\_SUT2*, respectively. The *Cmo\_SUT2* antisense probe served as a reporter for mature, functional companion cells. Scale bars are 50  $\mu\text{m}$ : (A) is common to (A-H, M, N), (I) is common to (I-L). Abbreviations are as follows: CC, companion cell; SE, sieve element; X, xylem.
