# Supplementary material
Source: PubMed Central journal article supplement (PMC1913722)
Supplement: plntcell_tpc.107.051920_7.pdf [file plntcell_tpc.107.051920_7.pdf]

**Supplemental Table 1:** Sequence accession numbers for members of the FT-TFL family analyzed. Accession numbers for *Populus trichocarpa* genes are gene model identifiers found at the Joint Genome Institute (<http://genome.jgipsf.org/Poptr1/Poptr1.home.html>).

| Gene Name     | cDNA Accession              |
|---------------|-----------------------------|
| Cm_FTL1       | DQ865290                    |
| Cm_FTL2       | DQ865291                    |
| Cmo_FTL1      | EF462211                    |
| Cmo_FTL2      | EF462212                    |
| Am_CEN        | S81193.1                    |
| At_ATC        | NM_128315.2                 |
| At_BFT        | NM_125597.1                 |
| At_FT         | NM_105222.2                 |
| At_MFT        | NM_101672.2                 |
| At_TFL1       | NM_120465.2                 |
| At_TSF        | NM_118156.1                 |
| Bn_TFL1-1     | AB017525.1                  |
| Le_SP         | U84140.1                    |
| Le_SFT/SP3D   | AY186735.1                  |
| Le_SP5G       | AY186736.1                  |
| Md_FT         | DQ535887.1                  |
| Nt_CET1       | AF145259.1                  |
| Nt_CET2       | AF145260.1                  |
| Nt_CET4       | AF145261.1                  |
| Os_FDR1       | AF159883.1                  |
| Os_FDR2/RCN1  | AF159882.1                  |
| Os_FT/FT-L4   | AC136448.2                  |
| Os_FTL/FT-L1  | AP002745.2                  |
| Os_FT-L10     | AP004070.3                  |
| Os_FT-L11     | AP003682.3                  |
| Os_FT-L6      | XM_472966.1                 |
| Os_FT-L7      | DP000011.2                  |
| Os_FT-L8      | AP003105.2                  |
| Os_FT-L9      | NM_191212.1                 |
| Os_Hd3a/FT-L2 | NM_185584.1                 |
| Os_MFT1       | NM_183536.2                 |
| Os_MFT2       | AP003620.3                  |
| Os_RCN2       | XM_472397.1                 |
| Os_RCN3       | AP005110.2                  |
| Os_RFT1/FT-L3 | NM_185581.1                 |
| Pt_BFT        | eugene3.00151192            |
| Pt_CEN1       | grail3.0001004901           |
| Pt_CEN2       | estExt_fgenesh4_pg.C_660171 |
| Pt_FT1        | fgenesh4_pg.C_LG_VIII000671 |
| Pt_FT2        | fgenesh4_pm.C_LG_X000701    |
| Pt_MFT        | fgenesh4_pg.C_LG_XV000341   |
| Ta_FT         | AY705794.1                  |
